# Supplementary material for: The Anti-Senescence Activity of Cytokinin Arabinosides in Wheat and Arabidopsis Is Negatively Correlated with Ethylene Production
Source: MDPI journal article supplement (doi:10.3390/ijms21218109), 2020-10-30
Supplement: s1 [file s1]

**Table S1** The expression level of selected genes involved in senescence regulation and protection against oxidative damage in *Arabidopsis thaliana* L. (AT, Col-0) after 48 h treatment with 10  $\mu\text{mol}\cdot\text{L}^{-1}$  3MeOBAPA. Gene ID, name and description and log2 fold change of mock-treated and 3MeOBAPA-treated transcript abundance are listed. RNA-seq gene expression analysis was performed within our previous study [26].

| ID        | Log2 fold change | Gene name         | description                       |
|-----------|------------------|-------------------|-----------------------------------|
| AT5G45890 | -12.35           | <i>SAG12</i>      | SENESCENCE-ASSOCIATED GENE 12     |
| AT5G03280 | -0.93            | <i>EIN2, ORE3</i> | ETHYLENE INSENSITIVE 2, ORESARA 3 |
| AT3G20770 | -0.69            | <i>EIN3</i>       | ETHYLENE INSENSITIVE 3            |
| AT5G39610 | -1.30            | <i>ORE1</i>       | ORESARA 1                         |
| AT2G42620 | -1.66            | <i>ORE9</i>       | ORESARA 9                         |
| AT2G43000 | 4.14             | <i>JUB1</i>       | JUNGBRUNNEN 1                     |
| AT3G22840 | 5.02             | <i>ELIP1</i>      | EARLY-LIGHT INDUCED PROTEIN 1     |
| AT4G14690 | 3.71             | <i>ELIP2</i>      | EARLY-LIGHT INDUCED PROTEIN 2     |
| AT1G30135 | 5.19             | <i>JAZ8</i>       | JASMONATE-ZIM-DOMAIN PROTEIN 7    |
| AT2G34600 | 1.13             | <i>JAZ7</i>       | JASMONATE-ZIM-DOMAIN PROTEIN 8    |
